# Supplementary material for: Validation of the Global Physical Activity Questionnaire for self-administration in a European context
Source: PubMed Central journal article supplement — BMJ Open Sport Exerc Med. 2017 May 8;3(1):e000206. doi: 10.1136/bmjsem-2016-000206 (PMC5530095; doi:10.1136/bmjsem-2016-000206), 2017-05-08
Supplement: bmjsem-2016-000206supp001.pdf [file bmjsem-2016-000206supp001.pdf]

Online Supplementary Material Document 1. Self-administered versions of GPAQ in German, French and Italian

1. German version

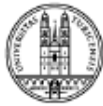

Universität  
Zürich<sup>UZH</sup>

Institut für  
Sozial- und Präventivmedizin  
Bewegung und Gesundheit

GLOBAL PHYSICAL ACTIVITY QUESTIONNAIRE (GPAQ)

Code

Datum beim Ausfüllen des Fragebogens:

|     |       |      |   |   |   |
|-----|-------|------|---|---|---|
|     |       |      | 2 | 0 | 1 |
| Tag | Monat | Jahr |   |   |   |

| Fragebogen zur körperlichen Aktivität                                                                                                                                                                                                                                                                                                                                                                                                                                                                                                                                                                                                              |                                                                                                                                                                                                                                     |
|----------------------------------------------------------------------------------------------------------------------------------------------------------------------------------------------------------------------------------------------------------------------------------------------------------------------------------------------------------------------------------------------------------------------------------------------------------------------------------------------------------------------------------------------------------------------------------------------------------------------------------------------------|-------------------------------------------------------------------------------------------------------------------------------------------------------------------------------------------------------------------------------------|
| <p>In den folgenden Fragen geht es darum, wie viel Zeit Sie in einer gewöhnlichen Woche mit verschiedenen körperlichen Aktivitäten verbringen. Bitte beantworten Sie diese Fragen auch dann, wenn Sie sich selbst nicht für eine körperlich aktive Person halten.</p> <p>Wenn Sie die Fragen beantworten, denken Sie daran, dass "<i>intensive körperliche Aktivitäten</i>" diejenigen Aktivitäten sind, die grosse Anstrengung erfordern und daher Atmung und Puls stark zunehmen. "<i>Moderate körperliche Aktivitäten</i>" sind solche, die moderate Anstrengung erfordern und zu einer leichten Erhöhung der Atmung und des Pulses führen.</p> |                                                                                                                                                                                                                                     |
| Körperliche Aktivität bei der Arbeit                                                                                                                                                                                                                                                                                                                                                                                                                                                                                                                                                                                                               |                                                                                                                                                                                                                                     |
| Denken Sie zuerst über die Zeit nach, während der Sie arbeiten. Schliessen Sie dabei all die Aufgaben ein, die Sie erledigen müssen, wie bezahlte und unbezahlte Arbeit, studieren/lernen, Aufgaben im Haushalt und Garten.                                                                                                                                                                                                                                                                                                                                                                                                                        |                                                                                                                                                                                                                                     |
| 1                                                                                                                                                                                                                                                                                                                                                                                                                                                                                                                                                                                                                                                  | <p>Beinhaltet Ihre Arbeit <i>intensive</i> körperliche Aktivität, bei der Atmung und Puls stark zunehmen, mit einer Dauer von mindestens 10 Minuten?<br/>(Beispiele: schwere Lasten tragen oder heben, graben oder Bauarbeiten)</p> |
| <p style="text-align: right;"><input type="checkbox"/> Ja<br/><input type="checkbox"/> Nein ⇒ weiter zu Frage 4</p>                                                                                                                                                                                                                                                                                                                                                                                                                                                                                                                                |                                                                                                                                                                                                                                     |
| 2                                                                                                                                                                                                                                                                                                                                                                                                                                                                                                                                                                                                                                                  | An wie vielen Tagen in einer gewöhnlichen Woche betätigen Sie sich bei der Arbeit körperlich <i>intensiv</i> ?                                                                                                                      |
| <input type="text"/> (Anzahl Tage)                                                                                                                                                                                                                                                                                                                                                                                                                                                                                                                                                                                                                 |                                                                                                                                                                                                                                     |
| 3                                                                                                                                                                                                                                                                                                                                                                                                                                                                                                                                                                                                                                                  | Wie viel Zeit verbringen Sie an einem solchen Tag bei der Arbeit mit <i>intensiver</i> körperlicher Aktivität?                                                                                                                      |
| <input type="text"/> : <input type="text"/> (Stunden : Minuten)                                                                                                                                                                                                                                                                                                                                                                                                                                                                                                                                                                                    |                                                                                                                                                                                                                                     |
| 4                                                                                                                                                                                                                                                                                                                                                                                                                                                                                                                                                                                                                                                  | Beinhaltet Ihre Arbeit <i>moderate</i> körperliche Aktivität, bei der Atmung und Puls leicht zunehmen, mit einer Dauer von mindestens 10 Minuten?<br>(Beispiele: Tragen leichter Lasten, Servieren, Boden putzen)                   |
| <p style="text-align: right;"><input type="checkbox"/> Ja<br/><input type="checkbox"/> Nein ⇒ weiter zu Frage 7</p>                                                                                                                                                                                                                                                                                                                                                                                                                                                                                                                                |                                                                                                                                                                                                                                     |
| 5                                                                                                                                                                                                                                                                                                                                                                                                                                                                                                                                                                                                                                                  | An wie vielen Tagen in einer gewöhnlichen Woche führen Sie bei der Arbeit <i>moderate</i> körperliche Aktivität aus?                                                                                                                |
| <input type="text"/> (Anzahl Tage)                                                                                                                                                                                                                                                                                                                                                                                                                                                                                                                                                                                                                 |                                                                                                                                                                                                                                     |
| 6                                                                                                                                                                                                                                                                                                                                                                                                                                                                                                                                                                                                                                                  | Wie viel Zeit verbringen Sie an einem solchen Tag bei der Arbeit mit <i>moderater</i> körperlicher Aktivität?                                                                                                                       |
| <input type="text"/> : <input type="text"/> (Stunden : Minuten)                                                                                                                                                                                                                                                                                                                                                                                                                                                                                                                                                                                    |                                                                                                                                                                                                                                     |
| Fortbewegung von Ort zu Ort                                                                                                                                                                                                                                                                                                                                                                                                                                                                                                                                                                                                                        |                                                                                                                                                                                                                                     |
| Die nächsten Fragen schliessen die körperliche Aktivität bei der Arbeit, die Sie bereits erwähnt haben, aus. Es geht nun um die Fortbewegung von Ort zu Ort, beispielsweise von zu Hause zur Arbeitsstelle, zum Einkaufen, zu Freunden oder ins Kino. Spaziergänge und Velotouren sollten Sie hingegen nicht einschliessen.                                                                                                                                                                                                                                                                                                                        |                                                                                                                                                                                                                                     |
| 7                                                                                                                                                                                                                                                                                                                                                                                                                                                                                                                                                                                                                                                  | Gehen Sie zu Fuss oder fahren Sie mit dem Velo, um von einem Ort zum anderen zu kommen, mit einer Dauer von mindestens 10 Minuten?                                                                                                  |
| <p style="text-align: right;"><input type="checkbox"/> Ja<br/><input type="checkbox"/> Nein ⇒ weiter zu Frage 10</p>                                                                                                                                                                                                                                                                                                                                                                                                                                                                                                                               |                                                                                                                                                                                                                                     |
| 8                                                                                                                                                                                                                                                                                                                                                                                                                                                                                                                                                                                                                                                  | An wie vielen Tagen in einer gewöhnlichen Woche gehen Sie zu Fuss oder fahren Sie mit dem Velo, um von einem Ort zum anderen zu kommen, mit einer Dauer von mindestens 10 Minuten?                                                  |
| <input type="text"/> (Anzahl Tage)                                                                                                                                                                                                                                                                                                                                                                                                                                                                                                                                                                                                                 |                                                                                                                                                                                                                                     |
| 9                                                                                                                                                                                                                                                                                                                                                                                                                                                                                                                                                                                                                                                  | Wie viel Zeit investieren Sie an einem solchen Tag, um zu Fuss oder mit dem Velo von einem Ort zum anderen zu kommen?                                                                                                               |
| <input type="text"/> : <input type="text"/> (Stunden : Minuten)                                                                                                                                                                                                                                                                                                                                                                                                                                                                                                                                                                                    |                                                                                                                                                                                                                                     |

Bitte wenden!

### Körperliche Aktivität in der Freizeit

Die nächsten Fragen schliessen die körperliche Aktivität bei der Arbeit und zur Fortbewegung von Ort zu Ort, die Sie bereits erwähnt haben, aus. Es geht nun um körperliche Aktivitäten und Sport während Ihrer Freizeit, inklusive Spaziergänge und Velotouren.

|    |                                                                                                                                                                                                                                                                |                                                                                   |
|----|----------------------------------------------------------------------------------------------------------------------------------------------------------------------------------------------------------------------------------------------------------------|-----------------------------------------------------------------------------------|
| 10 | Betreiben Sie in der Freizeit <i>intensive</i> körperliche Aktivitäten oder Sport, bei welchen Atmung und Puls stark zunehmen, mit einer Dauer von mindestens 10 Minuten?<br>(Beispiele: Joggen, Fussball, schnelles Velofahren, Fitnessstraining)             | <input type="checkbox"/> Ja<br><input type="checkbox"/> Nein ⇒ weiter zu Frage 13 |
| 11 | An wie vielen Tagen in einer gewöhnlichen Woche betreiben Sie <i>intensive</i> körperliche Aktivitäten oder Sport in der Freizeit?                                                                                                                             | <input type="text"/> (Anzahl Tage)                                                |
| 12 | Wie viel Zeit investieren Sie an einem solchen Tag in der Freizeit in <i>intensive</i> körperliche Aktivitäten oder Sport?                                                                                                                                     | <input type="text"/> : <input type="text"/> (Stunden : Minuten)                   |
| 13 | Betreiben Sie in der Freizeit <i>moderate</i> körperliche Aktivitäten oder Sport, bei welchen Atmung und Puls leicht zunehmen, mit einer Dauer von mindestens 10 Minuten?<br>(Beispiele: flottes Gehen/Wandern, lockeres Velofahren oder Schwimmen, Gymnastik) | <input type="checkbox"/> Ja<br><input type="checkbox"/> Nein ⇒ weiter zu Frage 16 |
| 14 | An wie vielen Tagen in einer gewöhnlichen Woche betreiben Sie <i>moderate</i> körperliche Aktivitäten oder Sport in der Freizeit?                                                                                                                              | <input type="text"/> (Anzahl Tage)                                                |
| 15 | Wie viel Zeit investieren Sie an einem solchen Tag in der Freizeit in <i>moderate</i> körperliche Aktivitäten oder Sport?                                                                                                                                      | <input type="text"/> : <input type="text"/> (Stunden : Minuten)                   |

### Sitzen

Bei der nächsten Frage geht es um die Zeit, die Sie mit Sitzen oder Ruhen verbringen, bei der Arbeit, zu Hause, zur Fortbewegung von Ort zu Ort oder in der Freizeit.  
(Beispiele: am Schreibtisch sitzen, beim Essen, Auto, Bus, Zug fahren, lesen, fernsehen, Computer etc.)  
Die Zeit, die Sie mit schlafen verbringen, sollte ausgeschlossen werden.

|    |                                                                               |                                                                 |
|----|-------------------------------------------------------------------------------|-----------------------------------------------------------------|
| 16 | Wie viel Zeit verbringen Sie an einem gewöhnlichen Tag mit Sitzen oder Ruhen? | <input type="text"/> : <input type="text"/> (Stunden : Minuten) |
|----|-------------------------------------------------------------------------------|-----------------------------------------------------------------|

### Weitere Fragen zu Ihrer Person

|    |                      |                         |
|----|----------------------|-------------------------|
| 17 | Wie gross sind Sie?  | <input type="text"/> cm |
| 18 | Wie schwer sind Sie? | <input type="text"/> kg |

2. French version

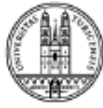

Universität  
Zürich <sup>UZH</sup>

Institut für  
Sozial- und Präventivmedizin  
Bewegung und Gesundheit

GLOBAL PHYSICAL ACTIVITY QUESTIONNAIRE (GPAQ)

Code

Date au moment du remplissage du questionnaire:

|      |  |  |      |   |   |       |
|------|--|--|------|---|---|-------|
|      |  |  | 2    | 0 | 1 |       |
| jour |  |  | mois |   |   | année |

| Questionnaire sur votre activité physique                                                                                                                                                                                                                                                                                                                                                                                                                                                                                                                                                                                                                                             |                                                                                                                                                                                                                                                                                                                                    |
|---------------------------------------------------------------------------------------------------------------------------------------------------------------------------------------------------------------------------------------------------------------------------------------------------------------------------------------------------------------------------------------------------------------------------------------------------------------------------------------------------------------------------------------------------------------------------------------------------------------------------------------------------------------------------------------|------------------------------------------------------------------------------------------------------------------------------------------------------------------------------------------------------------------------------------------------------------------------------------------------------------------------------------|
| <p>Les questions suivantes se rapportent au temps que vous consacrez à différents types d'activité physique lors d'une semaine typique. Veuillez répondre à ces questions même si vous ne vous considérez pas comme quelqu'un d'actif.</p> <p>Dans les questions suivantes, les « <i>activités physiques de forte intensité</i> » sont des activités nécessitant un effort physique important et causant une augmentation conséquente de la respiration ou du rythme cardiaque, et les « <i>activités physiques d'intensité modérée</i> » sont des activités qui demandent un effort physique modéré et causant une petite augmentation de la respiration ou du rythme cardiaque.</p> |                                                                                                                                                                                                                                                                                                                                    |
| Activités au travail                                                                                                                                                                                                                                                                                                                                                                                                                                                                                                                                                                                                                                                                  |                                                                                                                                                                                                                                                                                                                                    |
| <p>Pensez tout d'abord au temps que vous y consacrez au travail, qu'il s'agisse d'un travail rémunéré ou non, à étudier, aux tâches ménagères et au jardinage.</p>                                                                                                                                                                                                                                                                                                                                                                                                                                                                                                                    |                                                                                                                                                                                                                                                                                                                                    |
| 1                                                                                                                                                                                                                                                                                                                                                                                                                                                                                                                                                                                                                                                                                     | <p>Est-ce que votre travail implique des activités physiques de forte intensité qui nécessitent une augmentation conséquente de la respiration ou du rythme cardiaque, pendant au moins 10 minutes d'affilée ?<br/>(Exemples : soulever des charges lourdes, travailler sur un chantier ou effectuer un travail de maçonnerie)</p> |
| <input type="checkbox"/> Oui<br><input type="checkbox"/> Non <i>⇒ aller à la question 4</i>                                                                                                                                                                                                                                                                                                                                                                                                                                                                                                                                                                                           |                                                                                                                                                                                                                                                                                                                                    |
| 2                                                                                                                                                                                                                                                                                                                                                                                                                                                                                                                                                                                                                                                                                     | <p>Habituellement, combien de jours par semaine effectuez-vous des activités physiques de forte intensité dans le cadre de votre travail ?</p>                                                                                                                                                                                     |
| <input style="width: 40px;" type="text"/> (Nombre de jours)                                                                                                                                                                                                                                                                                                                                                                                                                                                                                                                                                                                                                           |                                                                                                                                                                                                                                                                                                                                    |
| 3                                                                                                                                                                                                                                                                                                                                                                                                                                                                                                                                                                                                                                                                                     | <p>Lors d'une journée habituelle durant laquelle vous effectuez des activités physiques de forte intensité, combien de temps consacrez-vous à ces activités ?</p>                                                                                                                                                                  |
| <input style="width: 30px;" type="text"/> : <input style="width: 30px;" type="text"/> (Heures : minutes)                                                                                                                                                                                                                                                                                                                                                                                                                                                                                                                                                                              |                                                                                                                                                                                                                                                                                                                                    |
| 4                                                                                                                                                                                                                                                                                                                                                                                                                                                                                                                                                                                                                                                                                     | <p>Est-ce que votre travail implique des activités physiques d'intensité modérée durant au moins 10 minutes d'affilée ?<br/>(Exemples : soulever une charge légère, servir, nettoyer le sol)</p>                                                                                                                                   |
| <input type="checkbox"/> Oui<br><input type="checkbox"/> Non <i>⇒ aller à la question 7</i>                                                                                                                                                                                                                                                                                                                                                                                                                                                                                                                                                                                           |                                                                                                                                                                                                                                                                                                                                    |
| 5                                                                                                                                                                                                                                                                                                                                                                                                                                                                                                                                                                                                                                                                                     | <p>Habituellement, combien de jours par semaine effectuez-vous des activités physiques d'intensité modérée dans le cadre de votre travail ?</p>                                                                                                                                                                                    |
| <input style="width: 40px;" type="text"/> (Nombre de jours)                                                                                                                                                                                                                                                                                                                                                                                                                                                                                                                                                                                                                           |                                                                                                                                                                                                                                                                                                                                    |
| 6                                                                                                                                                                                                                                                                                                                                                                                                                                                                                                                                                                                                                                                                                     | <p>Lors d'une journée habituelle durant laquelle vous effectuez des activités physiques d'intensité modérée, combien de temps consacrez-vous à ces activités ?</p>                                                                                                                                                                 |
| <input style="width: 30px;" type="text"/> : <input style="width: 30px;" type="text"/> (Heures : minutes)                                                                                                                                                                                                                                                                                                                                                                                                                                                                                                                                                                              |                                                                                                                                                                                                                                                                                                                                    |
| Se déplacer d'un endroit à l'autre                                                                                                                                                                                                                                                                                                                                                                                                                                                                                                                                                                                                                                                    |                                                                                                                                                                                                                                                                                                                                    |
| <p>Les questions suivantes excluent les activités physiques dans le cadre de votre travail, que vous avez déjà mentionnées. Maintenant, il s'agit de connaître votre façon habituelle de vous déplacer d'un endroit à l'autre ; par exemple pour aller au travail, faire des courses, visiter des amis ou aller au cinéma. Se promener et faire un tour à vélo ne doivent pas être inclus.</p>                                                                                                                                                                                                                                                                                        |                                                                                                                                                                                                                                                                                                                                    |
| 7                                                                                                                                                                                                                                                                                                                                                                                                                                                                                                                                                                                                                                                                                     | <p>Est-ce que vous effectuez des trajets d'au moins 10 minutes à pied ou à vélo ?</p>                                                                                                                                                                                                                                              |
| <input type="checkbox"/> Oui<br><input type="checkbox"/> Non <i>⇒ aller à la question 10</i>                                                                                                                                                                                                                                                                                                                                                                                                                                                                                                                                                                                          |                                                                                                                                                                                                                                                                                                                                    |
| 8                                                                                                                                                                                                                                                                                                                                                                                                                                                                                                                                                                                                                                                                                     | <p>Habituellement, combien de jours par semaine effectuez-vous des trajets d'au moins 10 minutes à pied ou à vélo ?</p>                                                                                                                                                                                                            |
| <input style="width: 40px;" type="text"/> (Nombre de jours)                                                                                                                                                                                                                                                                                                                                                                                                                                                                                                                                                                                                                           |                                                                                                                                                                                                                                                                                                                                    |
| 9                                                                                                                                                                                                                                                                                                                                                                                                                                                                                                                                                                                                                                                                                     | <p>Lors d'une de ces journées, combien de temps consacrez-vous à vos déplacements à pied ou à vélo ?</p>                                                                                                                                                                                                                           |
| <input style="width: 30px;" type="text"/> : <input style="width: 30px;" type="text"/> (Heures : minutes)                                                                                                                                                                                                                                                                                                                                                                                                                                                                                                                                                                              |                                                                                                                                                                                                                                                                                                                                    |

S'il vous plaît, tourner  
la page!

### Activités de loisirs

Les questions suivantes excluent les activités liées au travail et aux déplacements d'un endroit à l'autre que vous avez déjà mentionnées. Maintenant il s'agit de questions liées au sport et aux activités physiques de loisirs (les promenades et les tours à vélo inclus).

|    |                                                                                                                                                                                                                                                                                                                                                  |                                                                                                   |
|----|--------------------------------------------------------------------------------------------------------------------------------------------------------------------------------------------------------------------------------------------------------------------------------------------------------------------------------------------------|---------------------------------------------------------------------------------------------------|
| 10 | Est-ce que vous pratiquez des sports, du fitness ou des activités de loisirs de forte intensité qui nécessitent une augmentation importante de la respiration ou du rythme cardiaque pendant au moins 10 minutes d'affilée ?<br>(Exemples : courir, jouer au football, faire du vélo de forte intensité)                                         | <input type="checkbox"/> Oui<br><input type="checkbox"/> Non $\Rightarrow$ aller à la question 13 |
| 11 | Habituellement, combien de jours par semaine pratiquez-vous une activité sportive, du fitness ou d'autres activités de loisirs de forte intensité ?                                                                                                                                                                                              | <input type="text"/> (Nombre de jours)                                                            |
| 12 | Lors d'une de ces journées, combien de temps y consacrez-vous ?                                                                                                                                                                                                                                                                                  | <input type="text"/> : <input type="text"/> (Heures : minutes)                                    |
| 13 | Est-ce que vous pratiquez des sports, du fitness ou des activités de loisirs d'intensité modérée qui nécessitent une petite augmentation de la respiration ou du rythme cardiaque pendant au moins 10 minutes d'affilée ?<br>(Exemples : la marche rapide/faire de la randonnée, faire du vélo tranquillement ou nager, faire de la gymnastique) | <input type="checkbox"/> Oui<br><input type="checkbox"/> Non $\Rightarrow$ aller à la question 16 |
| 14 | Habituellement, combien de jours par semaine pratiquez-vous une activité sportive, du fitness ou d'autres activités de loisirs d'intensité modérée ?                                                                                                                                                                                             | <input type="text"/> (Nombre de jours)                                                            |
| 15 | Lors d'une de ces journées, combien de temps y consacrez-vous ?                                                                                                                                                                                                                                                                                  | <input type="text"/> : <input type="text"/> (Heures : minutes)                                    |

### Comportement sédentaire

La question suivante concerne le temps passé en position assise ou couchée, au travail, à la maison, en déplacement ou au loisir.  
Exemples : temps passé assis devant un bureau, à manger, en se déplaçant en voiture, en bus, en train, à lire, à regarder la télévision, à l'ordinateur.  
Cela n'inclut pas le temps passé à dormir.

|    |                                                                                            |                                                                |
|----|--------------------------------------------------------------------------------------------|----------------------------------------------------------------|
| 16 | Combien de temps passez-vous en position assise ou couchée lors d'une journée habituelle ? | <input type="text"/> : <input type="text"/> (Heures : minutes) |
|----|--------------------------------------------------------------------------------------------|----------------------------------------------------------------|

### Autres questions sur vous-même

|    |                          |                         |
|----|--------------------------|-------------------------|
| 17 | Quelle est votre taille? | <input type="text"/> cm |
| 18 | Combien pesez-vous?      | <input type="text"/> kg |

3. Italian version

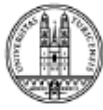

Universität  
Zürich<sup>UZH</sup>

Institut für  
Sozial- und Präventivmedizin  
Bewegung und Gesundheit

GLOBAL PHYSICAL ACTIVITY QUESTIONNAIRE (GPAQ)

Code

Data alla quale compila il questionario

|        |  |      |   |      |   |  |
|--------|--|------|---|------|---|--|
|        |  |      | 2 | 0    | 1 |  |
| giorno |  | mese |   | anno |   |  |

| Questionario sull'attività fisica                                                                                                                                                                                                                                                                                                                                                                                                                                                                                                                                                                              |                                                                                                                                                                                                                                                         |
|----------------------------------------------------------------------------------------------------------------------------------------------------------------------------------------------------------------------------------------------------------------------------------------------------------------------------------------------------------------------------------------------------------------------------------------------------------------------------------------------------------------------------------------------------------------------------------------------------------------|---------------------------------------------------------------------------------------------------------------------------------------------------------------------------------------------------------------------------------------------------------|
| <p>Nelle prossime domande si indaga quanto tempo, in una settimana normale, dedica a diverse attività fisiche. È pregato/a di rispondere a queste domande anche se non ritiene di essere una persona fisicamente attiva.</p> <p>Quando risponde alle domande, pensi che l'espressione "attività fisiche intense" corrisponde alle attività che richiedono tanto sforzo e quindi aumentano la respirazione e il battito cardiaco. L'espressione "attività fisiche moderate" corrisponde alle attività che richiedono uno sforzo moderato e quindi un aumento leggero della respirazione e delle pulsazioni.</p> |                                                                                                                                                                                                                                                         |
| Attività sul luogo di lavoro                                                                                                                                                                                                                                                                                                                                                                                                                                                                                                                                                                                   |                                                                                                                                                                                                                                                         |
| <p>Pensi innanzitutto al tempo che passa a lavorare. Includa tutti i compiti che deve svolgere, lavoro retribuito e non retribuito, studio/ apprendimento, compiti domestici e giardino.</p>                                                                                                                                                                                                                                                                                                                                                                                                                   |                                                                                                                                                                                                                                                         |
| 1                                                                                                                                                                                                                                                                                                                                                                                                                                                                                                                                                                                                              | <p>Il suo lavoro prevede <i>intensa</i> attività fisica durante la quale aumentano notevolmente la respirazione e il battito cardiaco, per 10 minuti almeno?<br/>(Esempi: trasportare o sollevare carichi pesanti, scavare o eseguire lavori edili)</p> |
| <p style="text-align: right;"><input type="checkbox"/> Sì</p> <p style="text-align: right;"><input type="checkbox"/> No → passare alla domanda 4</p>                                                                                                                                                                                                                                                                                                                                                                                                                                                           |                                                                                                                                                                                                                                                         |
| 2                                                                                                                                                                                                                                                                                                                                                                                                                                                                                                                                                                                                              | <p>Quanti giorni di una settimana normale svolge <i>intensa</i> attività fisica al lavoro?</p>                                                                                                                                                          |
| <p><input type="text"/> (Numero di giorni)</p>                                                                                                                                                                                                                                                                                                                                                                                                                                                                                                                                                                 |                                                                                                                                                                                                                                                         |
| 3                                                                                                                                                                                                                                                                                                                                                                                                                                                                                                                                                                                                              | <p>Quanto tempo trascorre compiendo <i>intensa</i> attività fisica in una di queste giornate lavorative?</p>                                                                                                                                            |
| <p><input type="text"/> : <input type="text"/> (Ore : Minuti)</p>                                                                                                                                                                                                                                                                                                                                                                                                                                                                                                                                              |                                                                                                                                                                                                                                                         |
| 4                                                                                                                                                                                                                                                                                                                                                                                                                                                                                                                                                                                                              | <p>Il suo lavoro prevede attività fisica <i>moderata</i> durante la quale aumentano leggermente la respirazione e il battito cardiaco, per almeno 10 minuti?<br/>(Esempi: trasportare carichi leggeri, servire, pulire pavimenti)</p>                   |
| <p style="text-align: right;"><input type="checkbox"/> Sì</p> <p style="text-align: right;"><input type="checkbox"/> No → passare alla domanda 7</p>                                                                                                                                                                                                                                                                                                                                                                                                                                                           |                                                                                                                                                                                                                                                         |
| 5                                                                                                                                                                                                                                                                                                                                                                                                                                                                                                                                                                                                              | <p>Quanti giorni di una settimana normale svolge attività fisica <i>moderata</i> al lavoro?</p>                                                                                                                                                         |
| <p><input type="text"/> (Numero di giorni)</p>                                                                                                                                                                                                                                                                                                                                                                                                                                                                                                                                                                 |                                                                                                                                                                                                                                                         |
| 6                                                                                                                                                                                                                                                                                                                                                                                                                                                                                                                                                                                                              | <p>Quanto tempo trascorre compiendo <i>moderata</i> attività fisica in una di queste giornate lavorative?</p>                                                                                                                                           |
| <p><input type="text"/> : <input type="text"/> (Ore : Minuti)</p>                                                                                                                                                                                                                                                                                                                                                                                                                                                                                                                                              |                                                                                                                                                                                                                                                         |
| Spostamenti da un posto all'altro                                                                                                                                                                                                                                                                                                                                                                                                                                                                                                                                                                              |                                                                                                                                                                                                                                                         |
| <p>Le prossime domande escludono l'attività fisica sul luogo di lavoro che ha già menzionato precedentemente. Ora s'indaga su come si sposta in genere da un posto all'altro. Per esempio, per andare al lavoro, per fare la spesa, per andare da amici o al cinema. „Fare una passeggiata" e „fare un giro in bicicletta" non è incluso.</p>                                                                                                                                                                                                                                                                  |                                                                                                                                                                                                                                                         |
| 7                                                                                                                                                                                                                                                                                                                                                                                                                                                                                                                                                                                                              | <p>Si sposta da un posto all'altro a piedi o in bicicletta per almeno 10 minuti?</p>                                                                                                                                                                    |
| <p style="text-align: right;"><input type="checkbox"/> Sì</p> <p style="text-align: right;"><input type="checkbox"/> No ← passare alla domanda 10</p>                                                                                                                                                                                                                                                                                                                                                                                                                                                          |                                                                                                                                                                                                                                                         |
| 8                                                                                                                                                                                                                                                                                                                                                                                                                                                                                                                                                                                                              | <p>Quanti giorni di una settimana normale va a piedi o in bicicletta per almeno 10 minuti per spostarsi da un posto all'altro?</p>                                                                                                                      |
| <p><input type="text"/> (Numero di giorni)</p>                                                                                                                                                                                                                                                                                                                                                                                                                                                                                                                                                                 |                                                                                                                                                                                                                                                         |
| 9                                                                                                                                                                                                                                                                                                                                                                                                                                                                                                                                                                                                              | <p>Quanto tempo investe in una di queste giornate per spostarsi a piedi o in bicicletta da un posto all'altro?</p>                                                                                                                                      |
| <p><input type="text"/> : <input type="text"/> (Ore : Minuti)</p>                                                                                                                                                                                                                                                                                                                                                                                                                                                                                                                                              |                                                                                                                                                                                                                                                         |

Si prega di voltare  
pagina !



**Attività nel tempo libero**

Le prossime domande escludono l'attività fisica sul luogo di lavoro e gli spostamenti da un posto all'altro che ha già menzionato precedentemente. Ora le viene chiesto che sport fa, se fa fitness e quali attività svolge nel tempo libero incluso camminare e „fare un giro in bicicletta“.

|    |                                                                                                                                                                                                                                                                             |                                                                                      |
|----|-----------------------------------------------------------------------------------------------------------------------------------------------------------------------------------------------------------------------------------------------------------------------------|--------------------------------------------------------------------------------------|
| 10 | Nel tempo libero pratica <i>intensa</i> attività fisica o sport con forte accelerazione della respirazione o del battito cardiaco per almeno 10 minuti?<br>(Esempi: correre, giocare a calcio, fare un giro in bicicletta (in modo rapido))                                 | <input type="checkbox"/> Sì<br><input type="checkbox"/> No → passare alla domanda 13 |
| 11 | Quanti giorni alla settimana normale pratica <i>intensa</i> attività fisica o sport nel tempo libero?                                                                                                                                                                       | <input type="text"/> (Numero di giorni)                                              |
| 12 | Quanto tempo investe in <i>intensa</i> attività fisica o sport in una di queste giornate di tempo libero?                                                                                                                                                                   | <input type="text"/> : <input type="text"/> (Ore : Minuti)                           |
| 13 | Nel tempo libero pratica attività fisica <i>moderata</i> o sport con leggera accelerazione della respirazione o del battito cardiaco per almeno 10 minuti?<br>(Esempi: un'andatura sostenuta/andare in montagna, fare passeggiata in bicicletta o nuotare, fare ginnastica) | <input type="checkbox"/> Sì<br><input type="checkbox"/> No → passare alla domanda 16 |
| 14 | Quanti giorni di una settimana normale pratica attività fisica <i>moderata</i> o sport nel tempo libero?                                                                                                                                                                    | <input type="text"/> (Numero di giorni)                                              |
| 15 | Quanto tempo investe in attività fisica <i>moderata</i> o sport in una di queste giornate di tempo libero?                                                                                                                                                                  | <input type="text"/> : <input type="text"/> (Ore : Minuti)                           |

**Comportamento sedentario**

Le prossime domande riguardano lo stare seduti o sdraiati, al lavoro, a casa, quando ci si sposta da un posto all'altro, o nel tempo libero.  
(Esempi: stando seduti alla scrivania, mentre mangia, alla guida della macchina, in pullman, in treno, mentre legge, guarda la televisione, davanti al computer)  
Non riguarda il tempo in cui si dorme.

|    |                                                                   |                                                            |
|----|-------------------------------------------------------------------|------------------------------------------------------------|
| 16 | Quanto tempo trascorre seduto o a riposo in una giornata normale? | <input type="text"/> : <input type="text"/> (Ore : Minuti) |
|----|-------------------------------------------------------------------|------------------------------------------------------------|

**Altre domande riguardanti la sua persona**

|    |                |                         |
|----|----------------|-------------------------|
| 17 | Quanto misura? | <input type="text"/> cm |
| 18 | Quanto pesa?   | <input type="text"/> kg |
