# Supplementary material for: Validation of the Global Physical Activity Questionnaire for self-administration in a European context
Source: PubMed Central journal article supplement — BMJ Open Sport Exerc Med. 2017 May 8;3(1):e000206. doi: 10.1136/bmjsem-2016-000206 (PMC5530095; doi:10.1136/bmjsem-2016-000206), 2017-05-08
Supplement: bmjsem-2016-000206supp002.pdf [file bmjsem-2016-000206supp002.pdf]

**Online Supplementary Material Table 1. Spearman correlations ( $r$ ) for time spent in different physical activity intensities and domains as recorded by GPAQ and Actigraph accelerometers with 95% CI based on Fisher's z transformation**

| GPAQ                                          | Accelerometer            | Total              | Sex                |                    | Age category       |                    |                    | Language region    |                    |                     |
|-----------------------------------------------|--------------------------|--------------------|--------------------|--------------------|--------------------|--------------------|--------------------|--------------------|--------------------|---------------------|
|                                               |                          |                    | Male               | Female             | 18-39 years        | 40-59 years        | ≥60 years          | German             | French             | Italian             |
| Total (MET-min/week)                          | Total (counts/min)       | 0.22 (0.12-0.32)   | 0.13 (-0.02-0.27)  | 0.31 (0.17-0.44)   | 0.36 (0.21-0.50)   | 0.23 (0.07-0.38)   | 0.03 (-0.19-0.24)  | 0.25 (0.07-0.41)   | 0.22 (0.01-0.41)   | 0.16 (-0.004-0.31)  |
| Total (MET-min/week)                          | Total (steps)            | 0.25 (0.15-0.35)   | 0.20 (0.06-0.34)   | 0.31 (0.17-0.44)   | 0.38 (0.23-0.52)   | 0.28 (0.12-0.42)   | 0.02 (-0.20-0.24)  | 0.26 (0.08-0.42)   | 0.29 (0.08-0.47)   | 0.20 (0.04-0.35)    |
| Total (min/week in mvpa)                      | Total (min/week in mvpa) | 0.11 (0.003-0.21)  | 0.04 (-0.11-0.19)  | 0.17 (0.03-0.31)   | 0.28 (0.12-0.43)   | 0.06 (-0.11-0.22)  | -0.00 (-0.22-0.22) | 0.16 (-0.02-0.33)  | 0.13 (-0.09-0.33)  | 0.02 (-0.15-0.18)   |
| Vigorous (min/week)                           | Vigorous (min/week)      | 0.46 (0.38-0.54)   | 0.35 (0.22-0.48)   | 0.55 (0.44-0.64)   | 0.40 (0.25-0.54)   | 0.52 (0.38-0.63)   | 0.21 (-0.01-0.41)  | 0.34 (0.18-0.49)   | 0.41 (0.22-0.57)   | 0.42 (0.28-0.54)    |
| Moderate (min/week)                           | Moderate (min/week)      | 0.16 (0.05-0.26)   | 0.16 (0.01-0.30)   | 0.17 (0.02-0.31)   | 0.25 (0.09-0.41)   | 0.11 (-0.06-0.27)  | 0.08 (-0.14-0.29)  | 0.18 (0.003-0.35)  | 0.17 (-0.04-0.37)  | 0.11 (-0.05-0.27)   |
| Moderate (min/week)                           | Light (min/week)         | 0.30 (0.20-0.39)   | 0.33 (0.20-0.46)   | 0.24 (0.10-0.37)   | 0.26 (0.09-0.41)   | 0.31 (0.15-0.45)   | 0.13 (-0.09-0.33)  | 0.31 (0.14-0.47)   | 0.22 (0.01-0.42)   | 0.31 (0.16-0.45)    |
| Sitting (hours/week)                          | Sitting (hours/week)     | 0.47 (0.39-0.55)   | 0.44 (0.31-0.55)   | 0.49 (0.37-0.59)   | 0.61 (0.49-0.70)   | 0.38 (0.23-0.52)   | 0.37 (0.18-0.54)   | 0.57 (0.43-0.68)   | 0.29 (0.08-0.47)   | 0.48 (0.35-0.59)    |
| Physical activity at work (MET-min/week)      | mvpa (min/week)          | -0.13 (-0.23-0.03) | -0.13 (-0.27-0.02) | -0.12 (-0.26-0.03) | -0.01 (-0.18-0.16) | -0.19 (-0.35-0.03) | -0.17 (-0.37-0.05) | -0.08 (-0.25-0.10) | -0.17 (-0.37-0.04) | -0.16 (-0.31-0.003) |
| Transport activities (MET-min/week)           | mvpa (min/week)          | 0.15 (0.05-0.25)   | 0.15 (0.003-0.29)  | 0.15 (0.006-0.29)  | 0.17 (-0.001-0.33) | 0.20 (0.04-0.36)   | 0.02 (-0.20-0.24)  | 0.12 (-0.06-0.30)  | 0.19 (-0.02-0.39)  | 0.15 (-0.006-0.31)  |
| Leisure-time physical activity (MET-min/week) | mvpa (min/week)          | 0.28 (0.18-0.38)   | 0.24 (0.10-0.38)   | 0.32 (0.18-0.44)   | 0.37 (0.21-0.51)   | 0.22 (0.06-0.38)   | 0.26 (0.05-0.45)   | 0.24 (0.06-0.40)   | 0.35 (0.15-0.53)   | 0.22 (0.07-0.37)    |

GPAQ = Global Physical Activity Questionnaire; MET = metabolic equivalent; mvpa = moderate-to-vigorous physical activity
